# Supplementary material for: FASN multi-omic characterization reveals metabolic heterogeneity in pancreatic and prostate adenocarcinoma
Source: PubMed Central journal article supplement (PMC9847120; doi:10.1186/s12967-023-03874-5), 2023-01-17
Supplement: 12967_2023_3874_MOESM1_ESM.pdf [file 12967_2023_3874_MOESM1_ESM.pdf]

Tissue Expression

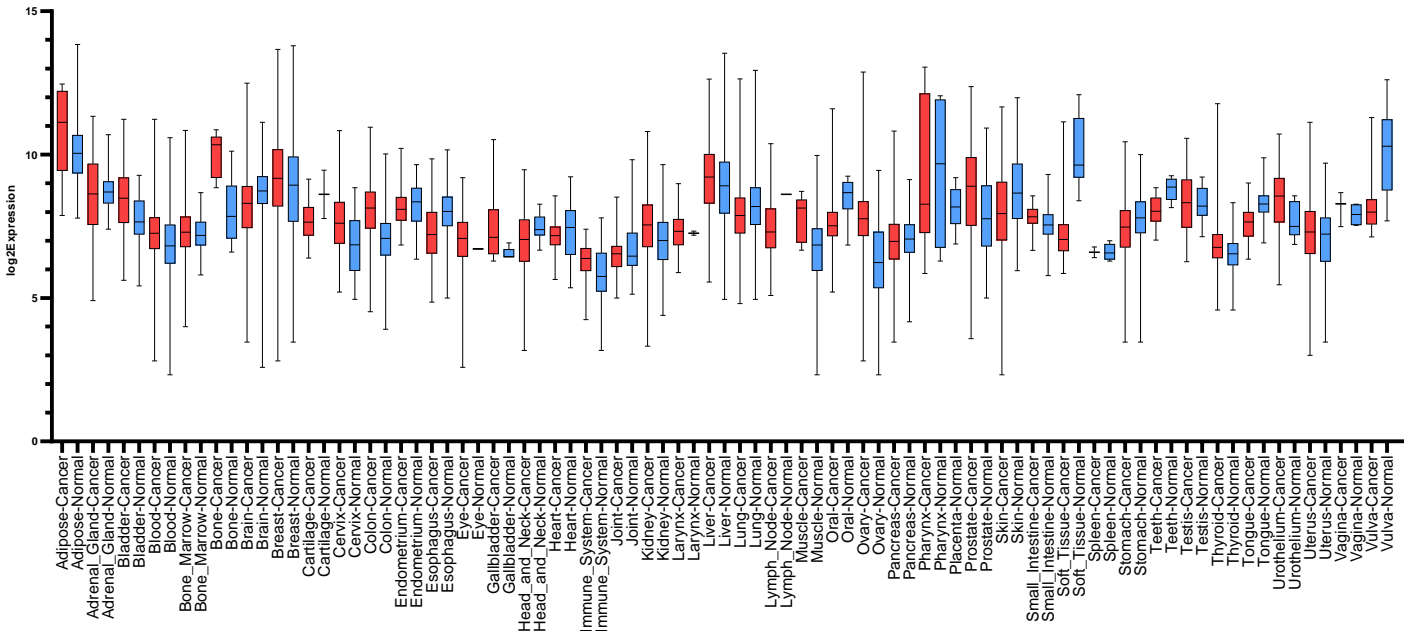

**Supplementary Figure 1:** Fatty acid synthase (FASN) transcription levels in cancer (red) and normal tissue (blue). mRNA expression in various cancer types was obtained from the GENT database. Y-axis shows log2 fold change values, while X-axis shows tissue types. Boxes indicate the median, and 25th and 75th percentiles. Red boxes indicate tumor tissues; blue boxes indicate normal tissues.

**A****Clustered gene expression for FASN**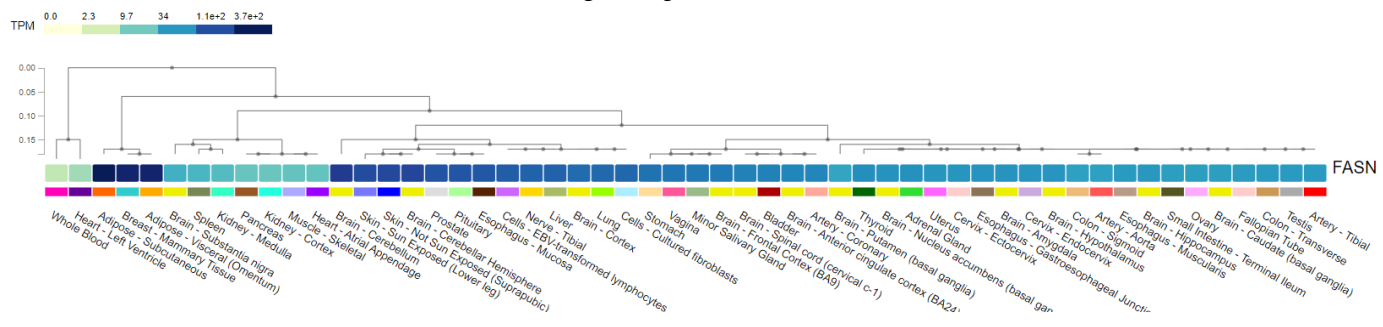**B****Bulk tissue gene expression for FASN**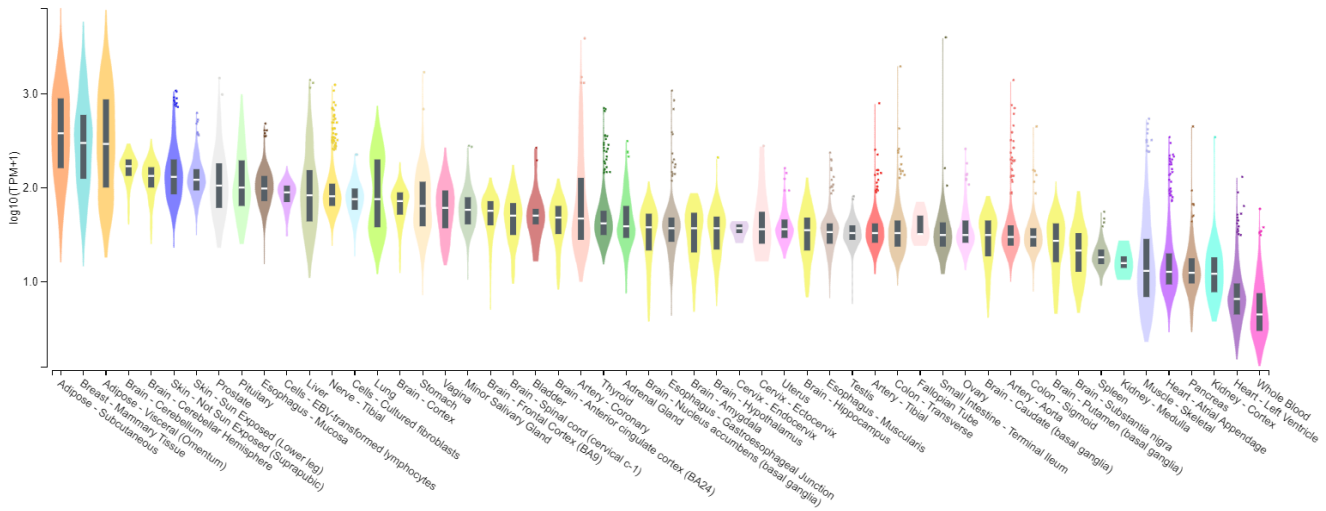

**Supplementary Figure 2: A** Gene query showing clustered FASN expression in tumors expressed as TPM. **B** Bulk tissue gene expression for FASN. Data is shown as a violin plot and on a log scale, sorted by expression, while dots represent outliers. Y-axis shows log<sub>2</sub> fold change values, while X-axis shows tissue types. Data were obtained from the GTEx portal database (<https://gtexportal.org>).

### TCGA dataset: RNA cancer

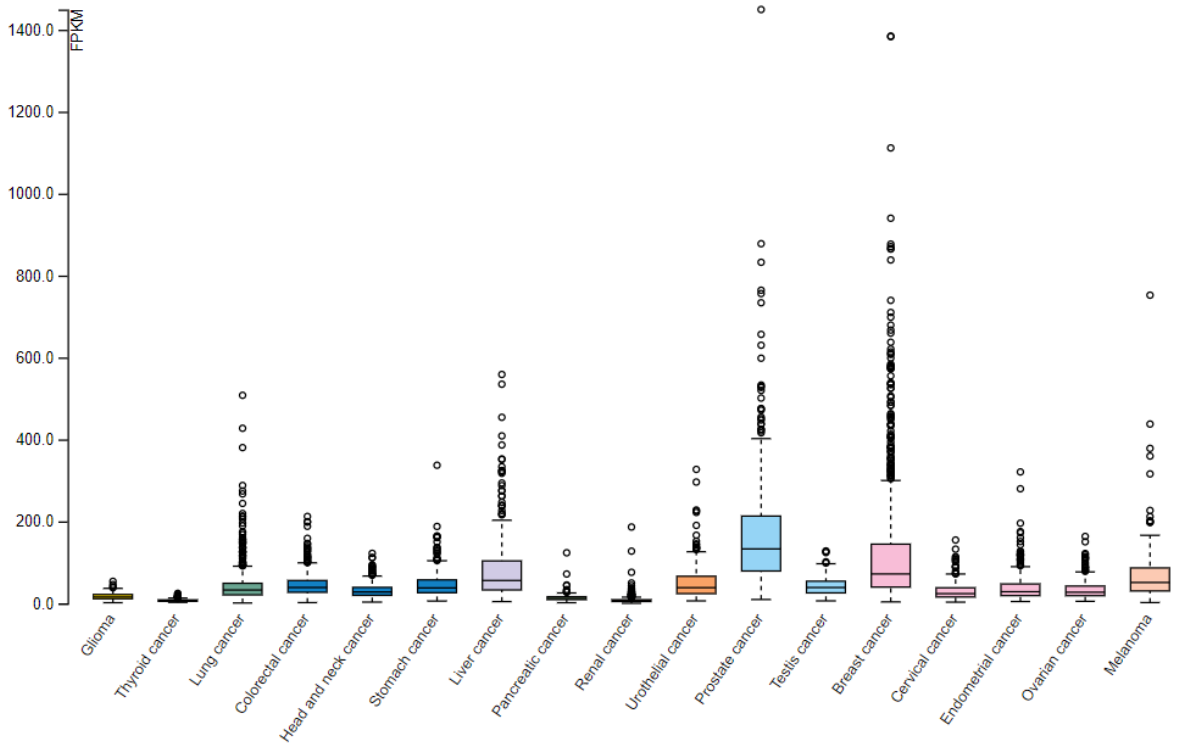

**Supplementary Figure 3:** RNA expression of FASN in cancer. Data is shown as a box plot with FPKM values, while dots represent outliers. Data were obtained from The Human Protein Atlas using pathological classification.



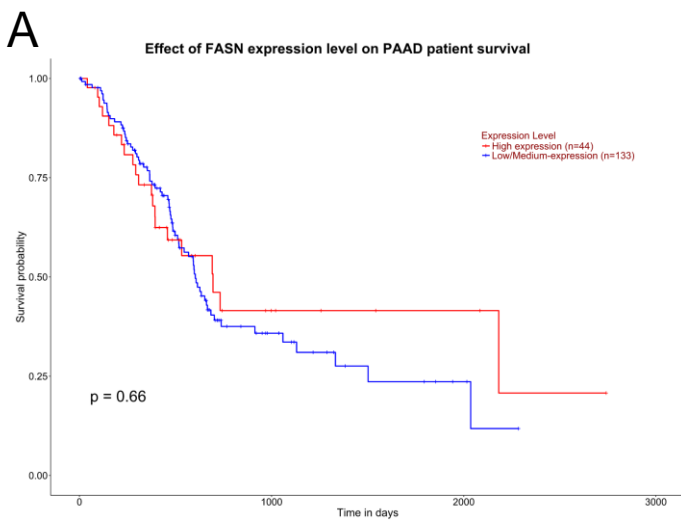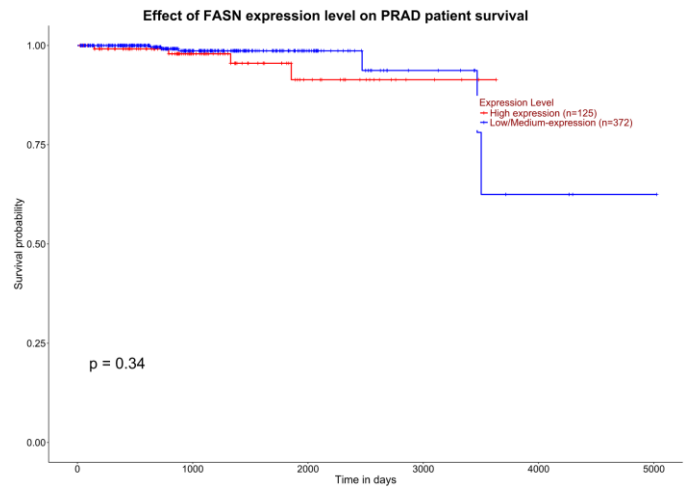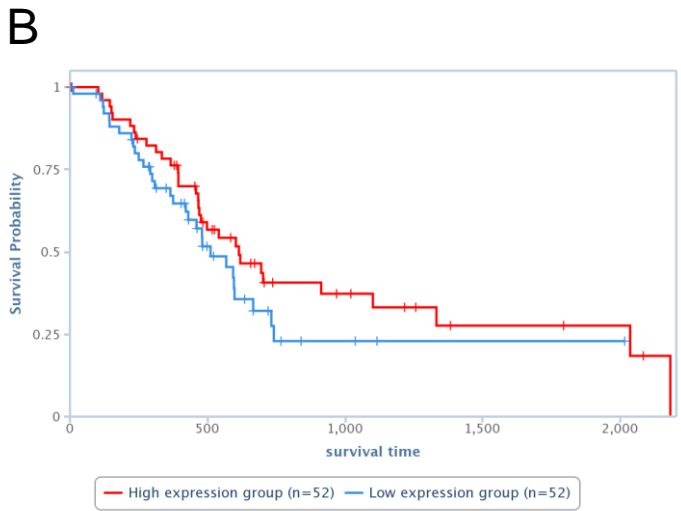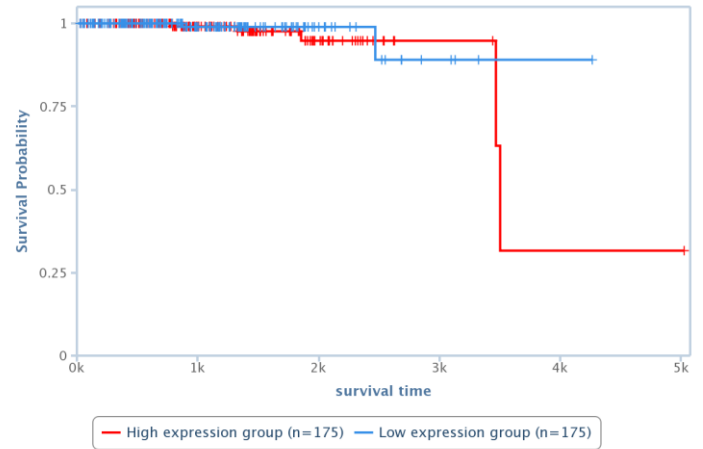

**Supplementary Figure 5: A-B** Overall survival prognosis based on FASN expression (high=red, low=blue) in PDAC and PCa. Data were obtained from UALCAN and cBioPortal platforms, respectively.



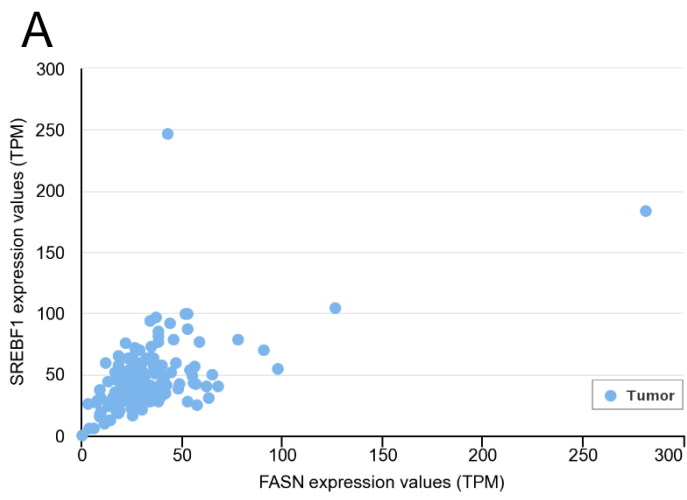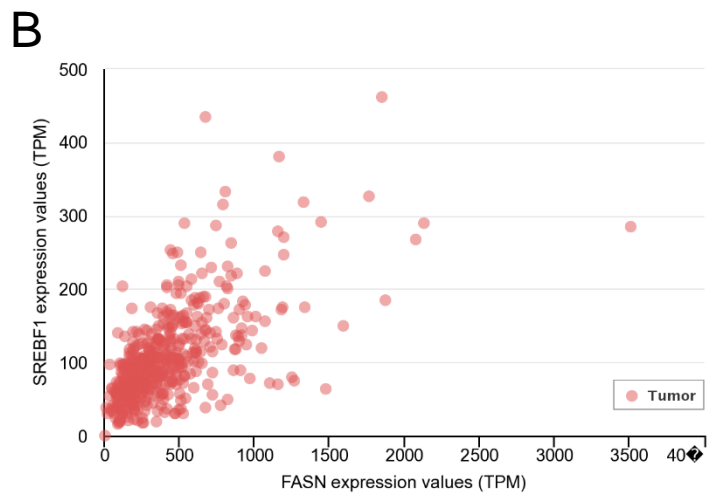

Pearson Correlation coefficient: 0.21

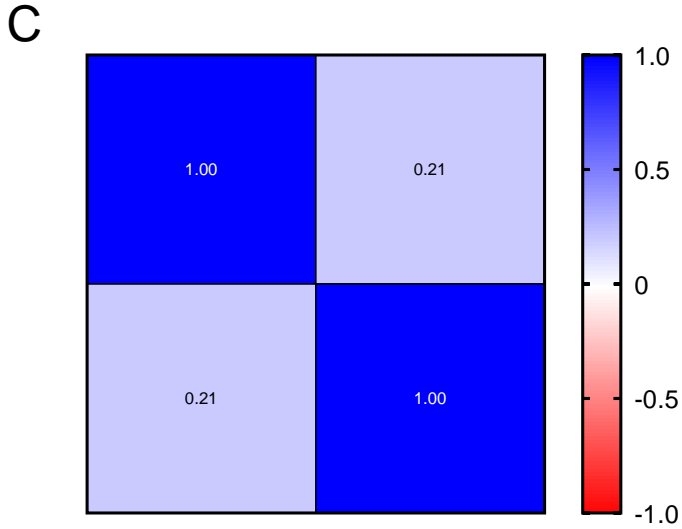

Pearson Correlation coefficient: 0.63

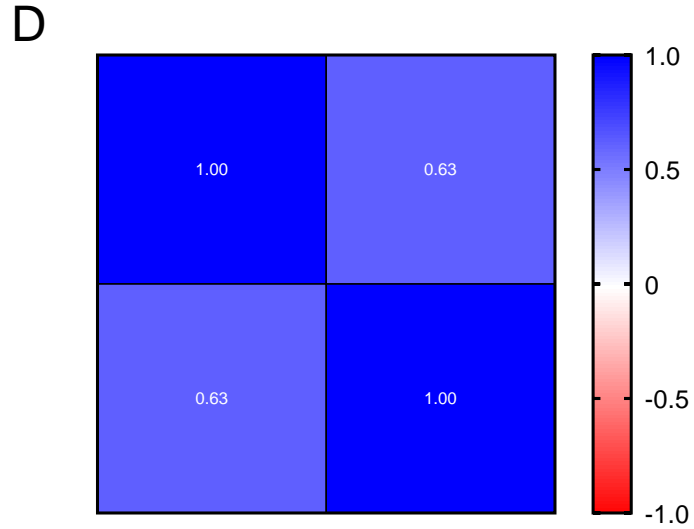

**Supplementary Figure 7: A-B** Scatter plots of FASN expression (X-axis) and SREBF1 (Y-axis) in PDAC and PCa. **C-D** Heatmaps showing Pearson correlation related to co-expression of FASN-SREBF1. Data were downloaded from UALCAN.

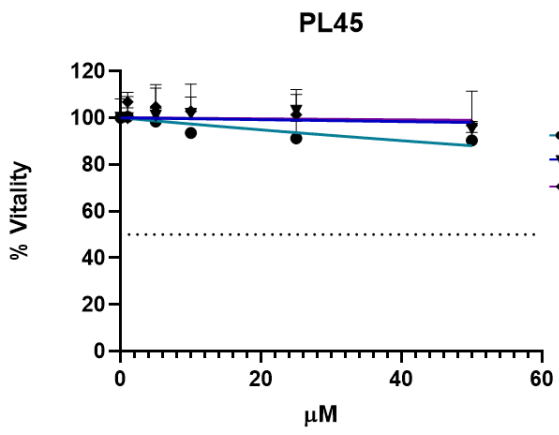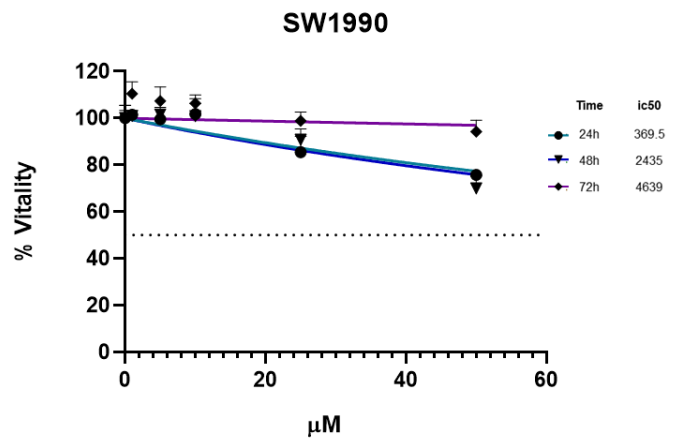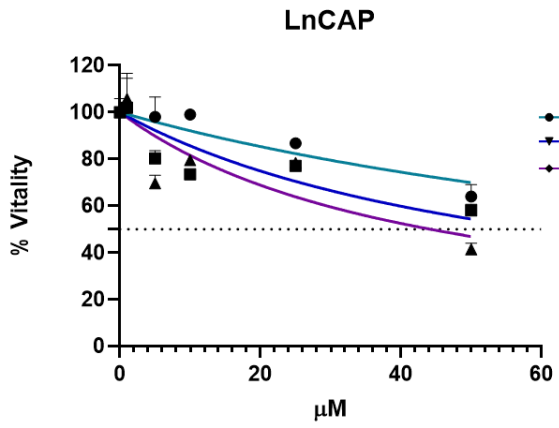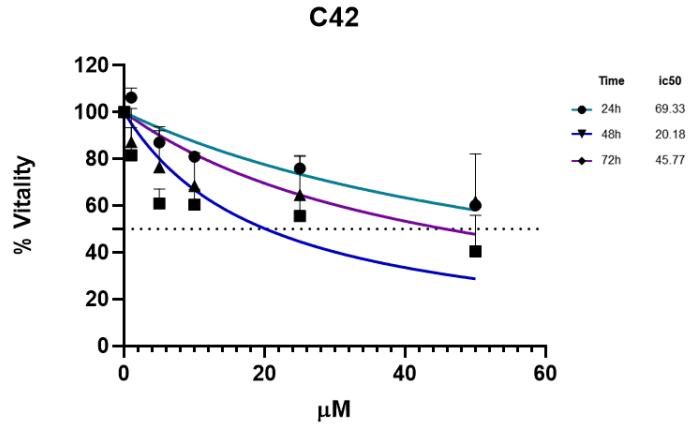

Supplementary Figure 8: Graphs showing IC50 for TVB-2640 in PL-45, SW1990, LnCaP, and C4-2 cells at 24 h, 48 h, and 72 h.



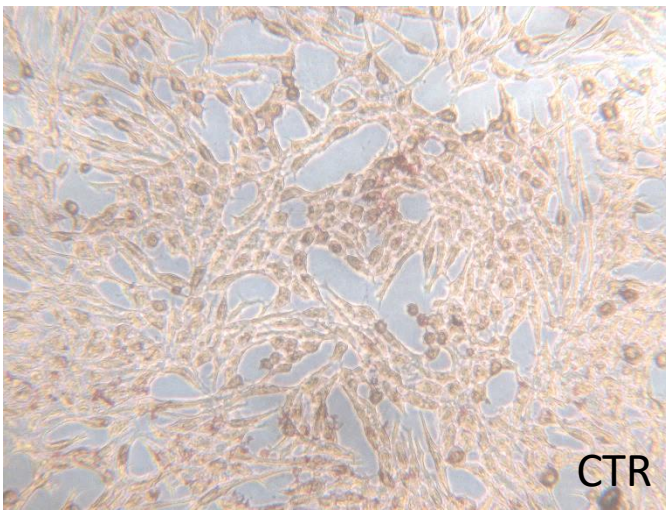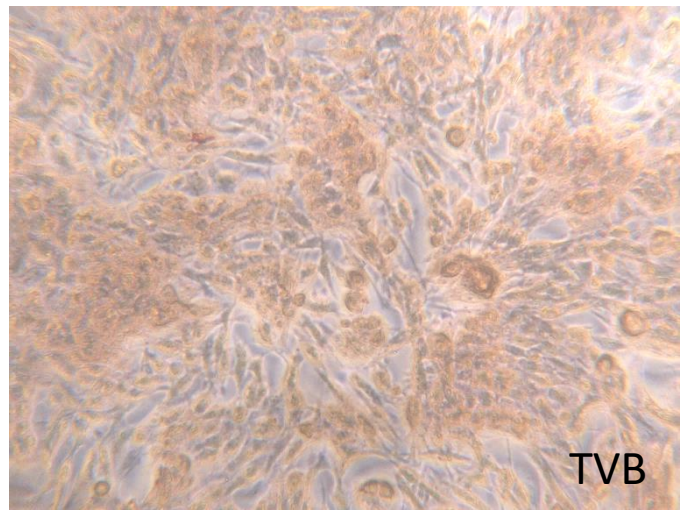

**Supplementary Figure 9:** Oil-Red O staining results of the lipid drop accumulation assay in LNCaP in control and after treatment with TVB-2640 50  $\mu$ M for 24h. Image acquisition has been done with light microscope 20X magnification.

**A**

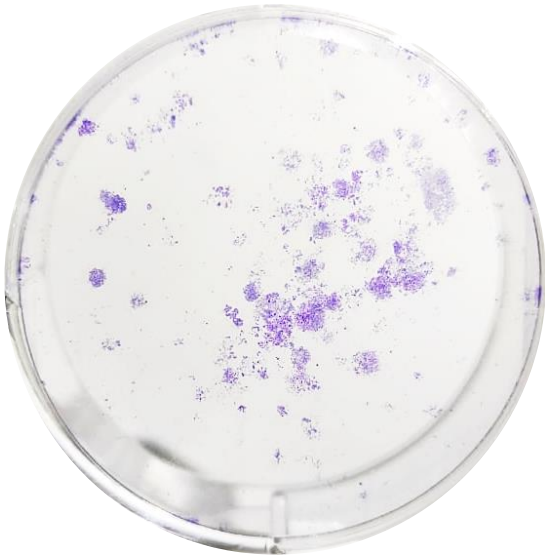

**B**

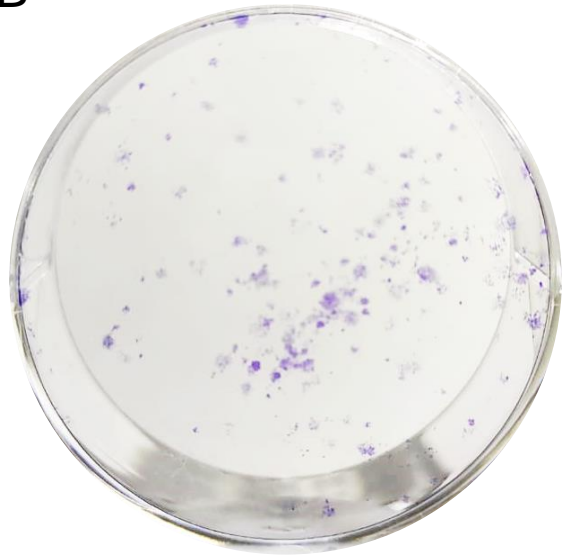

**Supplementary Figure 10:** Colony assay in LNCaP cells, **A**) control and **B**) treated with TVB-2640 50  $\mu$ M for 72 h.
